# Supplementary material
Source: ML conference proceedings conference paper supplement (https://proceedings.mlr.press/v139/divol21a.html)
Supplement: Supplementary file [file divol21a-supp.pdf]

## Supplementary Material for: Estimation and Quantization of Expected Persistence Diagrams

### A. Proofs of Section 3

We let  $\mu(f)$  denote the integral of some function  $f : \Omega \rightarrow \mathbb{R}$  against the measure  $\mu$ .

**Lemma 3.** *Let  $P$  be a probability measure on  $\mathcal{M}^p$  such that  $\mathbb{E}_P[\text{Pers}_p(\mu)] < \infty$ . Let  $(\mu_n)_{n \geq 1}$  be a sequence of i.i.d. variables of law  $P$  and let  $\bar{\mu}_n = \frac{1}{n}(\mu_1 + \dots + \mu_n)$ . Then,*

$$\text{OT}_p(\bar{\mu}_n, \mathbf{E}(P)) \xrightarrow[n \rightarrow \infty]{} 0 \text{ almost surely.} \quad (\text{A.1})$$

*Proof of Lemma 3.* By the strong law of large numbers applied to the function  $\|\cdot - \partial\Omega\|^p$ , we have  $\text{Pers}_p(\bar{\mu}_n) \rightarrow \text{Pers}_p(\mathbf{E}(P))$  almost surely. Also, for any continuous function  $f : \Omega \rightarrow \mathbb{R}$  with compact support, we have  $\bar{\mu}_n(f) \rightarrow \mathbf{E}(P)(f)$  almost surely. This convergence also holds almost surely for any countable family  $(f_i)_i$  of functions. Applying this result to a countable convergence-determining class for the vague convergence, we obtain that  $(\bar{\mu}_n)_n$  converges vaguely towards  $\mathbf{E}(P)$  almost surely. We conclude thanks to (Divol & Lacombe, 2020, Thm 3.7).  $\square$

Before proving Theorem 1, we give a general upper bound on the distance  $\text{OT}_p$  between two measures in  $\mathcal{M}^p$ . The bound is based on a classical multiscale approach to control a transportation distance between two measures, appearing for instance in (Singh & Póczos, 2018). Let  $J \in \mathbb{N}$ . For  $k \geq 0$ , let  $B_k = \{x \in A_L, \|x - \partial\Omega\| \in (L2^{-(k+1)}, L2^{-k}]\}$ . The sets  $\{B_k\}_{k \geq 0}$  form a partition of  $A_L$ . We then consider a sequence of nested partitions  $\{\mathcal{S}_{k,j}\}_{j=1}^J$  of  $B_k$ , where  $\mathcal{S}_{k,j}$  is made of  $N_{k,j}$  squares of side length  $\varepsilon_{k,j} = L2^{-(k+1)}2^{-j}$ . See also Figure 7. Let  $\mu|_{B_k}$  be the measure  $\mu$  restricted to  $B_k$  and  $\mu_k = \frac{\mu|_{B_k}}{\mu(B_k)}$  be the conditional probability on  $B_k$ . If  $\mu(B_k) = 0$ , we let  $\mu_k$  be any fixed measure, for instance the uniform distribution on  $B_k$ .

**Lemma 4.** *Let  $\mu, \nu$  be two measures in  $\mathcal{M}^p$ , supported on  $A_L$ . Then, for any  $J \geq 0$ , with  $c_p = 2^{-p/2}(1 + 1/(2^p - 1))$ ,*

$$\begin{aligned} \text{OT}_p^p(\mu, \nu) &\leq 2^{p/2} L^p \sum_{k \geq 0} 2^{-kp} \left( 2^{-Jp} (\mu(B_k) \wedge \nu(B_k)) \right. \\ &\quad \left. + c_p |\mu(B_k) - \nu(B_k)| + \sum_{\substack{1 \leq j \leq J \\ S \in \mathcal{S}_{k,j-1}}} 2^{-jp} |\mu(S) - \nu(S)| \right). \end{aligned}$$

*Proof.* Denote by  $m_k$  the quantity  $\mu(B_k) \wedge \nu(B_k)$ . Let  $\pi_k \in \Pi(\mu_k, \nu_k)$  be an optimal plan (in the sense of  $W_p$ ) between the probability measures  $\mu_k$  and  $\nu_k$ . If  $\mu(B_k) \leq \nu(B_k)$ , then  $\mu(B_k)\pi_k$  transports mass between  $\mu|_{B_k}$  and  $\frac{\mu(B_k)}{\nu(B_k)}\nu|_{B_k}$ . We then build an admissible plan between  $\frac{\mu(B_k)}{\nu(B_k)}\nu|_{B_k}$  and

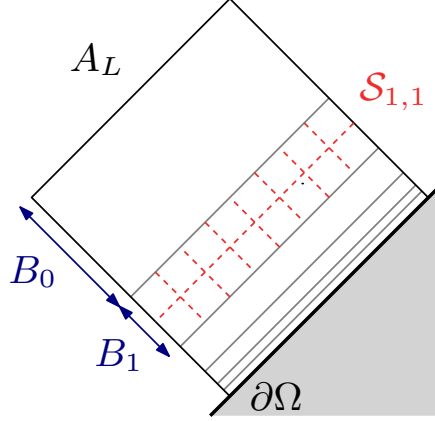

Figure 7. Partition of  $A_L$  used in the proof of Theorem 1

$\nu|_{B_k}$  by transporting  $\left(1 - \frac{\mu(B_k)}{\nu(B_k)}\right)\nu|_{B_k}$  to the diagonal, with cost bounded by  $\left(1 - \frac{\mu(B_k)}{\nu(B_k)}\right)\nu(B_k)(L2^{-k})^p$ . Acting in a similar way if  $\nu(B_k) \leq \mu(B_k)$ , we can upper bound  $\text{OT}_p^p(\mu, \nu)$  by

$$\sum_{k \geq 0} (m_k W_p^p(\mu_k, \nu_k) + L^p 2^{-kp} |\mu(B_k) - \nu(B_k)|). \quad (\text{A.2})$$

Lemma 6 in (Singh & Póczos, 2018) shows that

$$\begin{aligned} W_p^p(\mu_k, \nu_k) &\leq 2^{p/2} L^p 2^{-(k+1)p} \left( 2^{-Jp} \right. \\ &\quad \left. + \sum_{\substack{1 \leq j \leq J \\ S \in \mathcal{S}_{k,j-1}}} 2^{-jp} |\mu_k(S) - \nu_k(S)| \right). \end{aligned} \quad (\text{A.3})$$

Furthermore, one can check that for any  $S \subset B_k$

$$\begin{aligned} m_k |\mu_k(S) - \nu_k(S)| &\leq \\ |\mu(S) - \nu(S)| + \frac{\nu(S) \wedge \mu(S)}{\mu(B_k) \vee \nu(B_k)} |\mu(B_k) - \nu(B_k)|. \end{aligned}$$

By summing over  $S \in \mathcal{S}_{k,j-1}$ , we obtain that

$$\begin{aligned} m_k \sum_{S \in \mathcal{S}_{k,j-1}} |\mu_k(S) - \nu_k(S)| &\leq \\ \leq |\mu(B_k) - \nu(B_k)| + \sum_{S \in \mathcal{S}_{k,j-1}} |\mu(S) - \nu(S)|. \end{aligned} \quad (\text{A.4})$$

Using  $\sum_{j=1}^J 2^{-pj} \leq 2^{-p}/(1 - 2^{-p})$ , and putting together inequalities (A.2), (A.3) and (A.4), one obtains the inequality of Lemma 4.  $\square$

Before proving Theorem 1, we state a useful inequality. Let  $\mu \in \mathcal{M}_{M,L}^q$  and let  $B \subset \Omega$  be at distance  $\ell$  from the diagonal  $\partial\Omega$ . Then,

$$\mu(B) = \int_B \frac{\|x - \partial\Omega\|^q}{\|x - \partial\Omega\|^q} d\mu(x) \leq M\ell^{-q}. \quad (\text{A.5})$$

*Proof of Theorem 1.* Consider a distribution  $P \in \mathcal{P}_{M,L}^q$ . Remark first that for any measure  $\mu \in \mathcal{M}_{M,L}^q$ , we have  $\mu(B_k) \leq ML^{-q}2^{kq}$  one by (A.5). Let  $\mu$  be a random persistence measure of law  $P$  and  $\bar{\mu}_n$  be the empirical EPD associated to a  $n$ -sample of law  $P$ . By the Cauchy-Schwartz inequality, given a Borel set  $A \subset \Omega$ , we have

$$\mathbb{E}|\bar{\mu}_n(A) - \mathbf{E}(P)(A)| \leq \sqrt{\frac{\mathbb{E}[\mu(A)^2]}{n}}. \quad (\text{A.6})$$

The Cauchy-Schwartz inequality also yields, as  $|\mathcal{S}_{k,j-1}| = 2^{k+1}4^{j-1}$ ,

$$\begin{aligned} \sum_{S \in \mathcal{S}_{k,j-1}} \mathbb{E}|\hat{\mu}_n(S) - \mathbf{E}(P)(S)| &\leq \sum_{S \in \mathcal{S}_{k,j-1}} \sqrt{\frac{\mathbb{E}[\mu(S)^2]}{n}} \\ &\leq \sqrt{\frac{\mathbb{E}\left[\sum_{S \in \mathcal{S}_{k,j-1}} \mu(S)^2\right]}{n}} |\mathcal{S}_{k,j-1}| \\ &\leq \sqrt{\frac{\mathbb{E}[\mu(B_k)^2]}{n}} |\mathcal{S}_{k,j-1}| \leq \frac{ML^{-q}2^{kq}}{\sqrt{n}} 2^{\frac{k+1}{2}} 2^{j-1}. \end{aligned}$$

Note also that  $\sum_{S \in \mathcal{S}_{k,j-1}} \mathbb{E}|\hat{\mu}_n(S) - \mathbf{E}(P)(S)| \leq 2\mathbf{E}(P)(B_k) \leq 2ML^{-q}2^{kq}$  and that  $\bar{\mu}_n(B_k) \wedge \mathbf{E}(P)(B_k) \leq ML^{-q}2^{kq}$ . By using those three previous inequalities, Lemma 4 and inequality (A.6), we obtain that  $\mathbb{E}[\text{OT}_p^p(\bar{\mu}_n, \mathbf{E}(P))]$  is smaller than

$$\begin{aligned} &2^{p/2} ML^{p-q} \sum_{k \geq 0} 2^{-kp} \left( 2^{-Jp} 2^{kq} + \frac{c_p}{\sqrt{n}} 2^{kq} \right. \\ &\quad \left. + \sum_{j=1}^J 2^{-jp} 2^{kq} \left( 2 \wedge \frac{2^{\frac{k+1}{2}} 2^{j-1}}{\sqrt{n}} \right) \right) \\ &\leq c_{p,q} ML^{p-q} \left( 2^{-Jp} + \frac{1}{\sqrt{n}} + U \right), \end{aligned}$$

where  $U = \sum_{k \geq 0} \sum_{j=1}^J 2^{k(q-p)} 2^{-jp} \left( 1 \wedge \frac{2^{\frac{k}{2}} 2^j}{\sqrt{n}} \right)$ . To bound  $U$ , we remark that if  $k \geq \log_2(n)$ , then the minimum in the definition of  $U$  is equal to 1. Therefore, letting  $b_J = 1$  if  $p > 1$  and  $b_J = J$  if  $p = 1$ , we find that  $U$  is smaller than

$$\begin{aligned} &\sum_{k=0}^{\log_2(n)} \sum_{j=1}^J \frac{2^{k(q-p+1/2)} 2^{(1-p)j}}{\sqrt{n}} + \sum_{k \geq \log_2(n)} \sum_{j=1}^J 2^{-kp} 2^{-jp} \\ &\leq c_p b_J \sum_{k < \log_2(n)} \frac{2^{k(q+1/2-p)}}{\sqrt{n}} + c_p n^{-p} \\ &\leq c_{p,q} b_J (n^{-1/2} \vee n^{q-p}). \end{aligned}$$

Eventually, if  $p > 1$ , we may set  $J = +\infty$  and obtain a bound of order  $ML^{p-q}(n^{-1/2} + n^{q-p})$ . If  $p = 1$ , we choose  $J = (q-p)(\log n)/(2p)$  to obtain a rate of order  $n^{-1/2} + n^{q-p} \log n$ .  $\square$

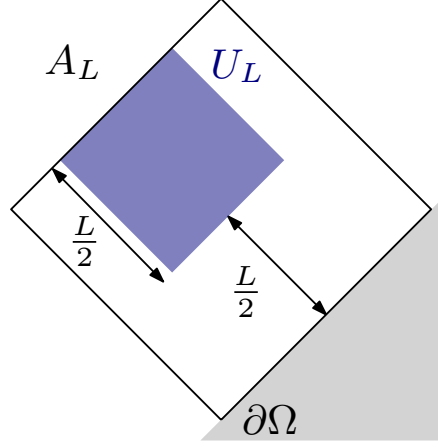

Figure 8. In the box  $U_L$ , the distance  $\rho$  is equal to the Euclidean distance.

*Proof of Theorem 2.* As  $\mathcal{P}_{L,M,T}^{q,s} \subset \mathcal{P}_{L,M}^q$ , we have  $\mathcal{R}_n(\mathcal{P}_{L,M}^q) \geq \mathcal{R}_n(\mathcal{P}_{L,M,T}^{q,s})$ . Therefore, Theorem 3, whose proof is found below, directly implies Theorem 2.  $\square$

*Proof of Theorem 3.* We first consider the case  $q = 0$ . If  $\mu, \nu$  are two measures on  $\Omega$  of mass smaller than  $M$ , then  $\text{OT}_p(\mu, \nu) = W_{p,\rho}(\Phi(\mu), \Phi(\nu))$  (Divol & Lacombe, 2020, Prop. 3.15), where  $\rho$  is the distance on  $\tilde{\Omega} := \Omega \cup \{\partial\Omega\}$  defined by  $\forall x, y \in \tilde{\Omega}$ ,

$$\rho(x, y) = \min(\|x - y\|, d(x, \partial\Omega) + d(y, \partial\Omega))$$

and  $\Phi(\mu) = \mu + (2M - |\mu|)\delta_{\partial\Omega}$ . Remark that  $\rho(x, y) = \|x - y\|$  if  $x, y \in U_L$ , where  $U_L \subset A_L$  is any  $\ell_1$ -ball of radius  $L/\sqrt{8}$  at distance  $L/2$  from the diagonal, see Figure 8. As  $\Phi$  is a bijection, the minimax rates for the estimation of  $\mathbf{E}(P)$  is therefore equal to

$$\inf_{\Phi(\hat{\mu}_n)} \sup_{P \in \mathcal{P}_{L,M,T}^{0,s}} \mathbb{E}[W_{p,\rho}^p(\Phi(\hat{\mu}_n), \Phi(\mathbf{E}(P)))].$$

Let  $\mathcal{Q}$  be the set of probability measures on  $U_L$  whose densities belong to  $B_{p',q'}$  with associated norm smaller than  $T/M$ . Then,  $\mathcal{P}_{M,L,T}^{0,s}$  contains in particular the set of all distributions  $P$  for which  $\mu \sim P$  satisfies  $\Phi(\mu) = M\delta_x$  and  $x$  is sampled according to some law  $\tau \in \mathcal{Q}$ . For such a distribution  $P$ , one has  $\Phi(\mathbf{E}(P)) = M\tau$ , so that the minimax rate is larger than

$$\inf_{\hat{a}_n} \sup_{\tau \in \mathcal{Q}} \mathbb{E}[W_p^p(\hat{a}_n, M\tau)],$$

where the infimum is taken on all measurable functions based on  $K$  observations of the form  $M\delta_{x_i}$  with  $x_1, \dots, x_n$  a  $n$ -sample of law  $\tau \in \mathcal{Q}$ . Hence, we have shown that the minimax rate for the estimation of  $\mathbf{E}(P)$  with respect to  $\text{OT}_p$  is larger up to a factor  $M$  than the minimax rate for the estimation of  $\tau \in \mathcal{Q}$  given  $n$  i.i.d. observations of law  $\tau$ . As the minimax rate for this problem is known to be larger

than  $L^p/\sqrt{n}$  (Weed & Berthet, 2019, Thm. 5), we obtain the conclusion in the case  $q = 0$ .

For the general case  $q > 0$ , we remark that if  $M' = ML^{-q}$  then  $\mathcal{P}_{M',L}^{0,s}$  is included in  $\mathcal{P}_{M,L,T}^{q,s}$ . In particular, the minimax rate on  $\mathcal{P}_{M,L,T}^{q,s}$  is larger than the minimax rate on  $\mathcal{P}_{M',L,T}^{0,s}$ , which is larger than  $c\frac{M'L^p}{\sqrt{n}} = c\frac{ML^{p-q}}{\sqrt{n}}$  for some constant  $c > 0$ .  $\square$

**Remark 3** (Case  $p = \infty$ ). *It can be shown that for  $p = \infty$ , the minimax rate is larger than  $c_a n^{-a}$ ,  $\forall a > 0$ . This is a consequence of an inequality between the  $\text{OT}_\infty$  distance and the distance between the support of the measures, for which minimax rates are known (Hardle et al., 1995). This means that no reasonable estimator exists on  $\mathcal{P}_L, M^\infty$ : some additional conditions should be added, while standard assumptions in the support estimation literature seem artificial in our context (as in Remark 1).*

## B. Delayed proofs from Section 4.1

*Proof of Lemma 2.* Fix a codebook  $\mathbf{c} = (c_1 \dots c_k)$ . Let  $T_{\mathbf{c}} : x \mapsto c_j$  if  $x \in V_j(\mathbf{c})$  ( $1 \leq j \leq k$ ) and  $\text{proj}_{\partial\Omega}(x)$  if  $x \in V_{k+1}(\mathbf{c})$ , where  $\text{proj}_{\partial\Omega}(x)$  denotes the orthogonal projection of a point  $x \in \Omega$  on the diagonal  $\partial\Omega$ . Let  $\pi$  be the pushforward of  $\mu$  by the map  $x \mapsto (x, T_{\mathbf{c}}(x))$ , extended on  $\bar{\Omega} \times \bar{\Omega}$  by  $\pi(U, \bar{\Omega}) = 0$  for  $U \subset \partial\Omega$  (intuitively,  $\pi$  pushes the mass of  $\mu$  on their nearest neighbor in  $\{c_1 \dots c_{k+1}\}$ ). One has, for  $A, B \subset \Omega$ ,  $\pi(A, \bar{\Omega}) = \mu((\text{id}, T_{\mathbf{c}})^{-1}(A, \bar{\Omega})) = \mu(A)$ , and  $\pi(\bar{\Omega}, B) = \mu(T_{\mathbf{c}}^{-1}(B)) = \sum_j \mu(V_j(\mathbf{c})) \mathbf{1}\{c_j \in B\}$ , that is  $\pi$  is an admissible between the measures  $\mu$  and  $\sum_j \mu(V_j(\mathbf{c}))\delta_{c_j}$ . Hence,

$$\text{OT}_p^p\left(\mu, \sum_j \mu(V_j(\mathbf{c}))\delta_{c_j}\right) \leq \int_{\bar{\Omega}} \min_{1 \leq j \leq k+1} \|x - c_j\|^p d\mu(x).$$

Let  $(m_1 \dots m_k)$  be a vector of non-negative weights, let  $\nu = \sum_{j=1}^k m_j \delta_{c_j}$ , and  $\pi$  be an admissible transport plan between  $\mu$  and  $\nu$ . One has

$$\begin{aligned} \int_{\bar{\Omega} \times \bar{\Omega}} \|x - y\|^p d\pi(x, y) &= \sum_{j=1}^{k+1} \int_{\bar{\Omega}} \|x - c_j\|^p d\pi(x, c_j) \\ &\geq \sum_{j=1}^{k+1} \int_{\bar{\Omega}} \min_{j'} \|x - c_{j'}\|^p d\pi(x, c_j) \\ &\geq \int_{\bar{\Omega}} \min_{j'} \|x - c_{j'}\|^p d\mu(x) \\ &\geq \text{OT}_p^p\left(\mu, \sum_{j=1}^k \mu(V_j(\mathbf{c}))\delta_{c_j}\right). \end{aligned}$$

Taking the infimum over  $\pi$  gives the conclusion.  $\square$

We now turn to the proof of Proposition 4. For technical reasons, we extend the function  $R_k$  to  $\bar{\Omega}^k$ , by noting that if  $c_j \in \partial\Omega$ , then the Voronoï cell  $V_j(\mathbf{c})$  is empty by definition, see (4.1).

**Lemma 5.** *Let  $\mathbf{c} \in \bar{\Omega}^k$  be such that there exists  $1 \leq j \leq k$  with  $\mu(V_j(\mathbf{c}^*)) = 0$ . Then,  $R_k(\mathbf{c}) > R_k^*$ .*

In particular, if two centroids of a codebook  $\mathbf{c}$  are equal or if a centroid  $c_j$  of  $\mathbf{c}$  belongs to  $\partial\Omega$ , then the condition of the above lemma is satisfied, so that the  $\mathbf{c}$  cannot be optimal. This proves the second part of Proposition 4.

*Proof of Lemma 5.* Let  $\mathbf{c} = (c_1, \dots, c_k) \in \bar{\Omega}^k$ . Assume without loss of generality that  $\mu(V_1(\mathbf{c})) = 0$ . Let  $\mathbf{c}_0 = (c_2, \dots, c_k) \in \bar{\Omega}^{k-1}$  (that is,  $\mathbf{c}$  where we removed the first centroid). Assume first that  $\mu(V_{k+1}(\mathbf{c})) > 0$ , that is there is some mass transported onto the diagonal. Consider a compact subset  $A \subset V_{k+1}(\mathbf{c})$  such that  $\mu(A) > 0$  and the diameter  $\text{diam}(A)$  of  $A$  is smaller than the distance  $d(A, \partial\Omega)$  between  $A$  and  $\partial\Omega$ . Let  $c' \in A$  and observe that, for  $x \in A$ ,  $\|x - c'\| < \|x - \partial\Omega\|$ . Therefore,

$$\int_A \|x - c'\|^p d\mu(x) < \int_A \|x - \partial\Omega\|^p d\mu(x).$$

Consider the measure  $\nu = \hat{\mu}(\mathbf{c}_0) + \mu(A)\delta_{c'}$ . Then

$$\begin{aligned} \text{OT}_p^p(\nu, \mu) &\leq \sum_{j=1}^k \int_{V_j(\mathbf{c})} \|x - c_j\|^p d\mu(x) \\ &\quad + \int_{V_{k+1}(\mathbf{c}) \setminus A} \|x - \partial\Omega\|^p d\mu(x) + \int_A \|x - c'\|^p d\mu(x) \\ &< R_k(\mathbf{c}), \end{aligned}$$

thus  $\mathbf{c}$  cannot be optimal. We can thus assume that  $\mu(V_{k+1}(\mathbf{c})) = 0$ , in which case we can reproduce the proof of (Graf & Luschgy, 2007, Thm 4.1), which gives that  $\mathbf{c}$  cannot be optimal either in that case, yielding the conclusion.  $\square$

**Lemma 6.**  *$R_k$  is continuous.*

*Proof of Lemma 6.* For a given  $x \in \bar{\Omega}$ , the map  $\mathbf{c} \mapsto \min_i \|x - c_i\|^p$  is continuous and upper bounded by  $\|x - \partial\Omega\|^p$ . Thus,  $R_k$  is continuous by dominated convergence as we have finite  $\text{Pers}_p$ .  $\square$

**Lemma 7.** *Let  $0 \leq \lambda < R_{k-1}^*$ . Then, the set  $\{\mathbf{c} \in \bar{\Omega}^k, R_k(\mathbf{c}) \leq \lambda\}$  is compact.*

*Proof of Lemma 7.* Fix  $\lambda < R_{k-1}^*$ . The set is closed by continuity of  $R_k$ , so that it suffices to show that it is bounded. Let  $\mathbf{c}$  be such that  $R_k(\mathbf{c}) \leq \lambda$ . Pick  $L$  such that  $\int_{A_L} \|x - \partial\Omega\|^p d\mu(x) \geq \lambda$  and  $\int_{A_L^c} \|x - \partial\Omega\|^p d\mu(x) < R_{k-1}^* - \lambda$ .

Such a  $L$  exists since  $\int_{\Omega} \|x - \partial\Omega\|^p d\mu(x) = \text{Pers}_p(\mu) = R_0^* \geq R_{k-1}^*$ . Then, all the  $c_j$ s must be in  $A_{2L}$ . Indeed, assume without loss of generality that  $c_1 \in A_{2L}^c$ . Then  $V_1(\mathbf{c}) \subset A_L^c$ , as any point in  $A_L$  is closer to the diagonal than to  $c_1$ . Therefore,

$$\begin{aligned} R_{k-1}^* &\leq \sum_{j=2}^{k+1} \int_{V_j(\mathbf{c})} \|x - c_j\|^p d\mu(x) \\ &\quad + \int_{V_1(\mathbf{c})} \min_{j \in \{2, \dots, k+1\}} \|x - c_j\|^p d\mu(x) \\ &\leq R_k(\mathbf{c}) + \int_{V_1(\mathbf{c})} \|x - \partial\Omega\|^p d\mu(x) \\ &\leq R_k(\mathbf{c}) + \int_{A_L^c} \|x - \partial\Omega\|^p d\mu(x) \\ &< \lambda + R_{k-1}^* - \lambda = R_{k-1}^*, \end{aligned}$$

leading to a contradiction.  $\square$

*Proof of Proposition 4.* We show by recursion on  $0 \leq m \leq k$  that  $R_m^* < R_{m-1}^*$  and that  $\mathbf{C}_m$  is a non-empty compact set (with the convention  $R_{-1}^* = +\infty$ ). The initialization holds as  $R_0^* = \text{Pers}_p(\mu) < +\infty$  with the empty codebook being optimal. We now prove the induction step. Let  $\mathbf{c} = (c_1, \dots, c_{m-1}) \in \mathbf{C}_{m-1}$ . Consider  $\mathbf{c}' = (c_1, c_1, c_2, \dots, c_{m-1})$ . Then,  $\mu(V_1(\mathbf{c}')) = 0$ , so that  $R_{m-1}^* = R_{m-1}(\mathbf{c}) = R_m(\mathbf{c}') > R_m^*$  by Lemma 5. Furthermore, pick  $\lambda \in (R_m^*, R_{m-1}^*)$ . Then,  $R_m^*$  is equal to the infimum of  $R_m$  on the set  $\{\mathbf{c} \in \overline{\Omega}^k, R_m(\mathbf{c}) \leq \lambda\}$ , which is compact according to Lemma 7. As the function  $R_k$  is continuous, the set of minimizers  $\mathbf{C}_m$  is a non-empty compact set, concluding the induction step.  $\square$

*Proof of Corollary 1.* The quantities being minimized in the definitions of  $D_{\min}$  and  $m_{\min}$  are both continuous functions of  $\mathbf{c}^*$ . As the set  $\mathbf{C}_k$  is compact, the minima are attained, and cannot be equal to 0 according to Proposition 4.  $\square$

### C. Proof of Theorem 5.

In the following, we fix a distribution  $P$  supported on  $\mathcal{M}_{L,M}^p$  and we consider  $\mathbf{c}^*$  be an optimal codebook of  $\mathbf{E}(P)$ . The different constants encountered in this section all depend on the parameters  $p, L, M, k, D_{\min}$  and  $m_{\min}$ . In particular, we introduce the quantity

$$m_{\max} := \sup_{\mu \in \mathcal{M}_{L,M}^p} \sup_{1 \leq j \leq k} \mu(V_j(\mathbf{c}^*)).$$

Note that  $m_{\max} \leq \frac{2^p M}{D_{\min}^p}$  as  $\int_{V_j(\mathbf{c}^*)} d\mu(x) \leq \frac{2^p}{D_{\min}^p} \int_{V_j(\mathbf{c}^*)} \|x - \partial\Omega\|^p d\mu(x)$ .

The proof of Theorem 5 follows the proof of (Chazal et al., 2021, Thm. 5). As a first step, we show that it is enough to prove the following lemma, which relates the loss of  $\mathbf{c}^{(t)}$  and the loss of  $\mathbf{c}^{(t+1)}$ .

**Lemma 8.** *There exists  $R_0 > 0$  such that, if  $\|c_j^{(0)} - c_j^*\| \leq R_0$  for  $1 \leq j \leq k$ , then*

$$\mathbb{E}\|\mathbf{c}^{(t+1)} - \mathbf{c}^*\|^2 \leq \left(1 - \frac{C_0}{t+1}\right) \mathbb{E}\|\mathbf{c}^{(t)} - \mathbf{c}^*\|^2 + \frac{C_1}{(t+1)^2},$$

for some constants  $C_0 > 1, C_1 > 0$ .

*Proof of Theorem 5.* From Lemma 8, we show by induction that  $u_t := \mathbb{E}\|\mathbf{c}^{(t)} - \mathbf{c}^*\|^2$  satisfies  $u_t \leq \frac{\alpha}{t+1}$  for  $\alpha = C_1/(C_0 - 1)$ . This concludes the proof as  $T$  is of order  $n/\log(n)$ . The initialization holds by assumption as long as  $R_0 \leq \alpha$ , whereas we have by induction

$$\begin{aligned} u_{t+1} &\leq \left(1 - \frac{C_0}{t+1}\right) \frac{\alpha}{t+1} + \frac{C_1}{(t+1)^2} \\ &\leq \frac{\alpha}{(t+1)^2} (t+1 - C_0 + C_1/\alpha) = \frac{\alpha t}{(t+1)^2}, \end{aligned}$$

which is smaller than  $\alpha/(t+2)$ .  $\square$

The proof of Lemma 8 is a close adaptation of (Chazal et al., 2021, Lemma 21). The proof of the latter contains tedious computations (that we do not reproduce here) which can be adapted *mutatis mutandis* to our setting once the two following key results are shown. Given a codebook  $\mathbf{c}$ , we let  $p_j(\mathbf{c}) = \mathbf{E}(P)(V_j(\mathbf{c}))$  and similarly, given a  $n$ -sample  $\mu_1, \dots, \mu_n$  of law  $P$ , we let  $\hat{p}_j(\mathbf{c}) = \bar{\mu}_n(V_j(\mathbf{c}))$ . Note that if  $\|\mathbf{c} - \mathbf{c}^*\|$  is small enough, one has  $p_j(\mathbf{c}) \leq 2m_{\max}$ . Also, we let  $w_p(\mathbf{c}, \mu)_j := \mu(V_j(\mathbf{c}))v_p(\mathbf{c}, \mu)_j$  for  $\mu \in \mathcal{M}^p$  and  $1 \leq j \leq k$ . Recall that we assume that the EPD  $\mathbf{E}(P)$  satisfies the margin condition (Definition 2) with parameters  $\lambda$  and  $r_0$  around the optimal codebook  $\mathbf{c}^*$ .

**Lemma 9** (Lemma 22 in (Chazal et al., 2021)). *Let  $R_0$  be small enough respect to  $r_0 D_{\min}^2/L^2$  and let  $\mathbf{c}$  be such that  $\|\mathbf{c} - \mathbf{c}^*\| \leq R_0$ . Then, we have*

$$\sum_{j=1}^k |p_j(\mathbf{c}) - p_j(\mathbf{c}^*)| \leq 2\lambda r_0,$$

and

$$\|w_2(\mathbf{c}, \mathbf{E}(P)) - w_2(\mathbf{c}^*, \mathbf{E}(P))\| \leq 7\sqrt{2}\lambda \frac{L^3}{D_{\min}^2} \|\mathbf{c} - \mathbf{c}^*\|.$$

As  $w_2(\mathbf{c}^*, \mathbf{E}(P))_j = p_j(\mathbf{c}^*)\mathbf{c}_j^*$ , Lemma 9 indicates that the application  $w_2(\cdot, \mathbf{E}(P))$  is Lipschitz continuous around an optimal codebook  $\mathbf{c}^*$ , a key property to show the convergence of the sequence  $(\mathbf{c}^{(t)})_t$ .

**Lemma 10** (Lemma 24 in (Chazal et al., 2021)). *Let  $\mathbf{c}$  be a codebook such that  $\hat{p}_j(\mathbf{c}) \leq 2m_{\max}$  (which is always possible if  $\|\mathbf{c} - \mathbf{c}^*\|$  is small enough). Then, with probability larger than  $1 - 2ke^{-x}$ , we have, for all  $1 \leq j \leq k$ ,*

$$|\hat{p}_j(\mathbf{c}) - p_j(\mathbf{c})| \leq \sqrt{\frac{4m_{\max}p_j(\mathbf{c})x}{n}} + \frac{2m_{\max}x}{3n}. \quad (\text{C.1})$$

Moreover, with probability larger than  $1 - e^{-x}$ , we have

$$\|w_2(\mathbf{c}, \bar{\mu}_n) - w_2(\mathbf{c}, \mathbf{E}(P))\| \leq 2m_{\max}L\sqrt{\frac{2k}{n}} \left(1 + \sqrt{\frac{x}{2}}\right). \quad (\text{C.2})$$

The proof of this lemma follows from standard concentration inequalities.

*Proof of Lemma 10.* Equation (C.1) follows from Bernstein inequality applied to the real-valued random variable  $0 \leq \hat{p}_j(\mathbf{c}) \leq 2m_{\max}$ , with variance bounded by  $\mathbb{E}[\mu(V_j(\mathbf{c}))^2]/n \leq m_{\max}p_j(\mathbf{c})/n$ .

For equation (C.2), we introduce the function  $f_j : x \mapsto x\mathbf{1}\{x \in V_j(\mathbf{c})\}$ , so that  $w_2(\mathbf{c}, \mu)_j = \mu(f_j)$ , the integral of  $f_j$  against  $\mu$ . We have  $w_2(\mathbf{c}, \mu_n)_j - w_2(\mathbf{c}, \mathbf{E}(P))_j = n^{-1} \sum_{i=1}^n (\mu_i(f_j) - \mathbf{E}(P)(f_j))_j$ . Note that  $\|\mu_i(f_j)\| \leq \sqrt{2L} \cdot 2m_{\max}$ . We write

$$\begin{aligned} & \mathbb{E} \left\| \frac{1}{n} \sum_{i=1}^n (\mu_i(f_j) - \mathbf{E}(P)(f_j))_j \right\| \\ & \leq \sqrt{\mathbb{E} \left\| \frac{1}{n} \sum_{i=1}^n (\mu_i(f_j) - \mathbf{E}(P)(f_j))_j \right\|^2} \\ & \leq \sqrt{\frac{1}{n} \mathbb{E} \|\mu_1(f_j)\|_j^2} \leq 2\sqrt{\frac{k}{n}} \sqrt{2L} m_{\max}. \end{aligned}$$

Also, note that  $F(\mu_1, \dots, \mu_n) = \|w_2(\mathbf{c}, \mu_n) - w_2(\mathbf{c}, \mathbf{E}(P))\|$  satisfies a bounded difference condition of parameter  $4\sqrt{2L}m_{\max}$  (Boucheron et al., 2013, Sec. 6.1). A bounded difference inequality (Boucheron et al., 2013, Thm. 6.2) yields the result.  $\square$

The proof of Lemma 9 relies on the following lemma, that essentially tells that the area of misclassified points when using a codebook  $\mathbf{c}$  instead of an optimal one  $\mathbf{c}^*$  can be controlled linearly in terms of  $\|\mathbf{c}^* - \mathbf{c}\|$ . Note that this result is well-known when boundaries between the cells are hyperplanes (as it is the case in standard quantization), it remains to treat the case when the boundary is a parabola. Let  $d(x, A)$  be the distance from a point  $x \in \Omega$  to  $A \subset \Omega$ .

**Lemma 11.** *Let  $\mathbf{c}^*$  be an optimal codebook, and  $\mathbf{c} \in A_L^k$ . Let  $x \in A_L$  and  $1 \leq j \leq k$ . Assume that  $x \in V_j(\mathbf{c}^*) \cap V_{k+1}(\mathbf{c})$ . Then,  $d(x, \partial V_j(\mathbf{c}^*)) \leq \frac{7L^2}{2D_{\min}^2} \|\mathbf{c}^* - \mathbf{c}\|$ . Symmetrically, if  $x \in V_{k+1}(\mathbf{c}^*) \cap V_j(\mathbf{c})$ , one has  $d(x, \partial V_{k+1}(\mathbf{c}^*)) \leq \frac{7L^2}{2D_{\min}^2} \|\mathbf{c}^* - \mathbf{c}\|$ .*

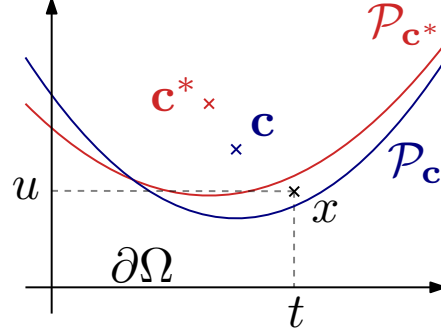

Figure 9. Illustration of the proof of Lemma 9

*Proof of Lemma 11.* For convenience, we write in this proof the coordinates of points in the basis  $(\partial\Omega, \partial\Omega^\perp)$ , that  $x \in \Omega$  will have coordinates  $(a, b)$  where  $a$  is the projection of  $x$  on  $\partial\Omega$  and  $b = \|x - \partial\Omega\|$ . Also, given  $y = (a, b) \in \Omega$ , we let  $\mathcal{P}_y$  be the parabola with focus  $y$  and directrix  $\partial\Omega$ . To put it another way, if  $y = (a, b)$ , then  $\mathcal{P}_y$  is the image of  $\partial\Omega$  by the map

$$f(a, b, \cdot) : t \mapsto \frac{(t-a)^2}{2b} + \frac{b}{2}.$$

One can check that for all  $t \in [-L/2, L/2]$ , if  $b = \|y - \partial\Omega\| \geq D_{\min}$ , we have  $\left|\frac{\partial f}{\partial a}\right| \leq \frac{L}{D_{\min}}$  and  $\left|\frac{\partial f}{\partial b}\right| \leq \frac{1}{2} + \frac{(t-a)^2}{b} \leq \frac{1}{2} + \frac{2L^2}{D_{\min}^2}$ .

Let  $c_j^* = (a^*, b^*)$  and  $c_j = (a, b)$ . Let  $x = (t, u) \in V_j(c_j^*) \cap V_{k+1}(c)$ . Then,  $u \geq f(a^*, b^*, t)$ , whereas  $u \leq f(a, b, t)$ . The distance  $d(x, \partial V_j(c_j^*))$  is smaller than  $u - f(a^*, b^*, t)$

$$\begin{aligned} u - f(a^*, b^*, t) & \leq f(a, b, t) - f(a^*, b^*, t) \\ & \leq |f(a^*, b^*, t) - f(a, b^*, t)| + |f(a, b^*, t) - f(a, b, t)| \\ & \leq \int_{a \wedge a^*}^{a \vee a^*} \left| \frac{\partial f}{\partial a}(a, b^*, t) \right| da + \int_{b \wedge b^*}^{b \vee b^*} \left| \frac{\partial f}{\partial b}(a, \beta, t) \right| d\beta \\ & \leq \frac{L}{D_{\min}} |a - a^*| + \left( \frac{1}{2} + \frac{2L^2}{D_{\min}^2} \right) |b - b^*| \\ & \leq \left( \frac{1}{2} + \frac{L}{D_{\min}} + \frac{2L^2}{D_{\min}^2} \right) \|\mathbf{c} - \mathbf{c}^*\| \leq \frac{7}{2} \frac{L^2}{D_{\min}^2} \|\mathbf{c} - \mathbf{c}^*\|, \end{aligned}$$

which proves the claim.  $\square$

*Proof of Lemma 9.* This proof is inspired from (Levrard et al., 2015, Appendix A.3). Let us prove the first point.

One has, with  $t = \frac{7L^2}{2D_{\min}^2} \|\mathbf{c} - \mathbf{c}^*\| \leq r_0$ ,

$$\begin{aligned} \sum_{j=1}^k |p_j(\mathbf{c}) - p_j(\mathbf{c}^*)| & = \sum_{j=1}^k |\mathbf{E}(P)(V_j(\mathbf{c})) - \mathbf{E}(P)(V_j(\mathbf{c}^*))| \\ & \leq 2 \sum_j \sum_{j' \neq j} \mathbf{E}(P)(V_j(\mathbf{c}) \cap V_{j'}(\mathbf{c}^*)) \\ & \leq 2\mathbf{E}(P)[N(\mathbf{c}^*)^t] \leq 2\lambda t \leq 2\lambda r_0. \end{aligned}$$

where we applied Lemma 11 and the margin condition. To prove the second inequality, remark that  $w_2(\mathbf{c}, \mathbf{E}(P))_j = \int_{V_j(\mathbf{c})} x d\mathbf{E}(P)(x)$ . Therefore,

$$\begin{aligned}
 & \|w_2(\mathbf{c}, \mathbf{E}(P)) - w_2(\mathbf{c}^*, \mathbf{E}(P))\| \\
 & \leq \sum_{j=1}^k \|w_2(\mathbf{c}, \mathbf{E}(P))_j - w_2(\mathbf{c}^*, \mathbf{E}(P))_j\| \\
 & \leq \sum_{j=1}^k \left\| \int_{V_j(\mathbf{c})} x d\mathbf{E}(P)(x) - \int_{V_j(\mathbf{c}^*)} x d\mathbf{E}(P)(x) \right\| \\
 & \leq 2 \sum_j \sum_{j' \neq j} \int_{V_j(\mathbf{c}) \cap V_{j'}(\mathbf{c}^*)} \|x\| d\mathbf{E}(P)(x) \\
 & \leq 2\sqrt{2}L\lambda t \leq 7\sqrt{2}\lambda \frac{L^3}{D_{\min}^2} \|\mathbf{c} - \mathbf{c}^*\|. \quad \square
 \end{aligned}$$
